# Supplementary material
Source: Springer Nature journal article supplement (https://www.springermedizin.de/resource/supplementary/12901_2012_96_MOESM1_ESM.pdf/9515256)

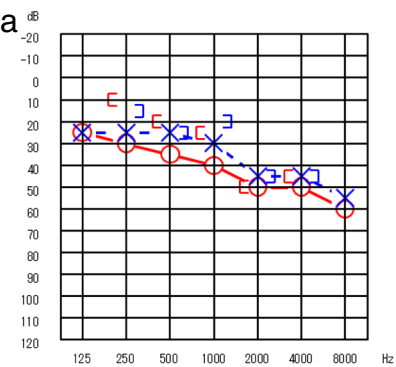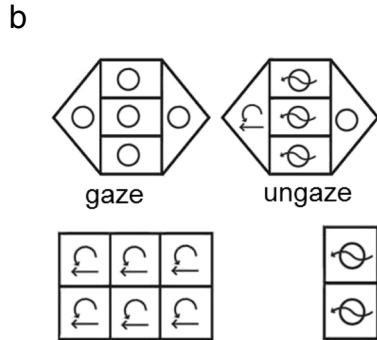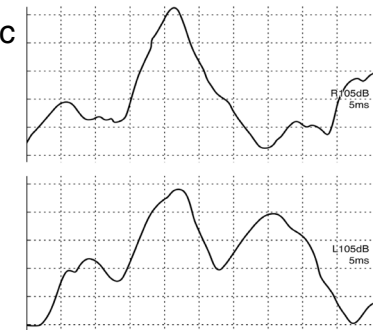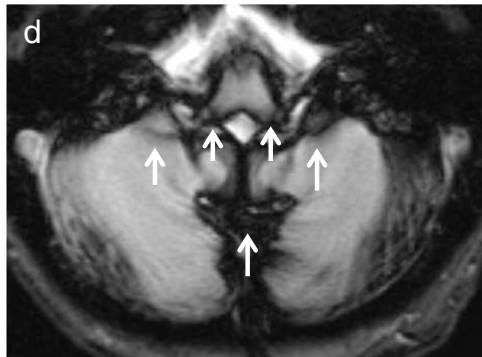

Supplement: MOESM1 [file 9515256]
